# 1 **Modelling $G \times E$ with historical weather information im-** 2 **proves genomic prediction in new environments**

3 Jussi Gillberg<sup>1\*</sup>, Pekka Marttinen<sup>1</sup>, Hiroshi Mamitsuka<sup>1,2</sup> & Samuel Kaski<sup>1\*</sup>

4 1. Helsinki Institute for Information Technology HIIT, Department of Computer Science, Aalto  
5 University, PO Box 15400, 00076 Aalto, Finland.

6 2. Institute for Chemical Research, Kyoto University, Gokasho, Uji 6110011, Japan

7 **Interaction between the genotype and the environment ( $G \times E$ ) has a strong impact on the**  
8 **yield of major crop plants. Although influential, taking  $G \times E$  explicitly into account in plant**  
9 **breeding has remained difficult. Recently  $G \times E$  has been predicted from environmental and**  
10 **genomic covariates, but existing works have not shown that generalization to new environ-**  
11 **ments and years without access to in-season data is possible and practical applicability re-**  
12 **mains unclear. Using data from a Barley breeding program in Finland, we construct an**  
13 **in-silico experiment to study the viability of  $G \times E$  prediction under practical constraints. We**  
14 **show that the response to the environment of a new generation of untested Barley cultivars**  
15 **can be predicted in new locations and years using genomic data, machine learning and his-**  
16 **torical weather observations for the new locations. Our results highlight the need for models**  
17 **of  $G \times E$ : non-linear effects clearly dominate linear ones and the interaction between the soil**  
18 **type and daily rain is identified as the main driver for  $G \times E$  for Barley in Finland. Our study**  
19 **implies that genomic selection can be used to capture the yield potential in  $G \times E$  effects for**  
20 **future growth seasons, providing a possible means to achieve yield improvements, needed for**

21 **feeding the growing population.**

22 Global yield improvements are needed to feed the growing population <sup>1</sup>. One possibility is to  
23 breed varieties for higher environmental adaptability, known as *targeted breeding* <sup>2</sup>. By improving  
24 the genetic fit of varieties in their growth environments, yield potential in the interaction between  
25 the genotype and environment could be realised. While the importance of  $G \times E$  for agronomic  
26 performance is widely accepted, utilisation calls for methods that predict yields in new environ-  
27 ments, because actual experimental data, consisting of yields of plant variety candidates from yield  
28 trials, will in practice be available from only a very limited number of environments. Importantly,  
29 prediction of a plant's response to a new environment cannot be based on weather data from the  
30 growth season, as those will never be available at the time of prediction.

31 Methods for “cold start” prediction problems <sup>3</sup>, where predictions are needed for completely  
32 novel instances, have been developed within the machine learning community. Example appli-  
33 cations include design of novel drugs for previously unseen cancers <sup>4</sup>, and recommendations in  
34 on-line shopping for new customers and/or products <sup>3</sup>. These methods are based on using ex-  
35 ternal covariate data that describe properties of the novel instances. We develop a new method,  
36 an extension of the Kernelized Bayesian Matrix Factorization <sup>5</sup>, to account for the uncertainty in  
37 the covariates, which allows the use of historical records to predict weather conditions for future  
38 growth seasons, and eventually makes future  $G \times E$  prediction for yield possible. Therefore, our  
39 new method, unlike the existing alternatives <sup>6-8</sup>, does not rely on accurate weather information  
40 from the growth season from the new location (Figure 1).

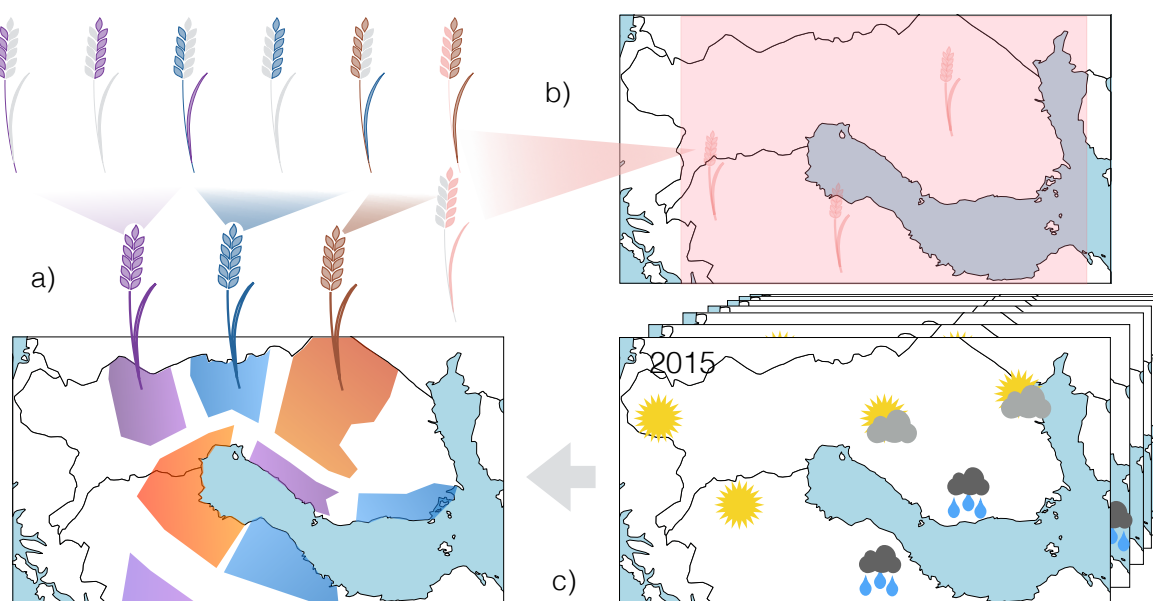

Figure 1: Outline of our approach. a) Precision breeding aims at producing varieties that are optimal for a specific environment. As compared to traditional breeding (b), targeted breeding aims at higher environmental adaptation, i.e., smaller target environments. Weather (microclimate) is a crucial driver for agronomic performance, but as it is unknown for future growth seasons, we use historical weather records (c) to predict the environmental stresses. The growth locations differ with respect to their estimated probabilities of extreme conditions and our method can be used to manage risks by trading-off yield potential for stress tolerance, when the risk in a particular environment is elevated.

41 In genomic selection (GS)<sup>9</sup>, field trials are replaced with genomic predictions to speed-up  
42 plant breeding. We formulate an *in silico* experimental setup for GS in targeted breeding that,  
43 unlike existing works<sup>7,8,10-12</sup>, strictly satisfies all realistic constraints: test locations, years, and  
44 genotypes are all genuinely new (not part of the training set) and yields are predicted for the off-  
45 spring of the training set. In this setup, we demonstrate the feasibility of targeted breeding by in-  
46 vestigating the accuracy of  $G \times E$  prediction using environmental data including historical weather  
47 information but without in-season data (Model  $M_{G+E+GE}^{\text{hist}}$ ). We compare this with multiple com-  
48 peting settings, including the non-realistic ideal situation having in-season data ( $M_{G+E+GE}$ ), a

49 model without the  $G \times E$  interaction ( $M_{G+E}$ ), a previous implementation with  $G \times E$  interactions  
50 using in-season data (GE-BLUP)<sup>8</sup>, and the industry-standard that does not include  $G \times E$  (best  
51 linear unbiased prediction using genomic data<sup>13</sup>; GBLUP). Data from a barley breeding program  
52 in Finland from Boreal Plant Breeding Ltd, including historical weather information for the target  
53 environments, are divided into training, validation, and test sets, and the prediction accuracy is  
54 measured as the average correlation between predicted and observed yields in the test sets<sup>8</sup> (Fig-  
55 ure 2c). A sensitivity analysis is done to explore the impact of model assumptions. A description  
56 of the model and the setup can be found in Materials and Methods, and further details are given in  
57 the Supporting Information.

58 Modelling  $G \times E$  with historical weather data,  $M_{G+E+GE}^{\text{hist}}$ , improves predictive accuracy as  
59 compared to the industry-standard, GBLUP (Figure 2a;  $p=0.011$ , a two-sided paired Wilcoxon  
60 signed rank test,  $df=17$ ). The improvement is comparable to using in-season data ( $M_{G+E+GE}$ ,  
61  $p=0.023$ ). The Bayesian methods in general show higher accuracy whereas GE-BLUP performs  
62 poorly with the data available. Overall, the absolute prediction accuracy of all methods was rel-  
63 atively low in this challenging setup, with  $M_{G+E+GE}^{\text{hist}}$  having the highest correlation of 0.105.  
64 Nevertheless, the improvement is considerable over the industry-standard with correlation 0.077,  
65 with the proposed new method explaining 85% more of the variation of the phenotype on average.

66 The sensitivity analysis demonstrates considerable variability between test environments  
67 (Figure 2c). Indeed, including  $G \times E$  interaction terms into the model decreased accuracy in 1/18  
68 environments, had little effect in 11/18 environments, but improved the accuracy substantially in

69 6/18 environments. In the last group, increasing model complexity by adding more  $G \times E$  com-  
70 ponents consistently improved performance, which highlights the potential to increase accuracy  
71 through complex modelling of  $G \times E$ . Importance of different data sources to the predictions can  
72 be further analysed by investigating the weights of the different kernels, used to summarise the data  
73 sources (Figure S 3). We see that the two most influential kernels were the ones that represented 1)  
74 the non-linear interaction between soil type and daily rainfall, and 2) the non-linear effect of rain,  
75 matching well the biological understanding of the problem.

76 Our experiments confirmed that prediction in new environments is a challenging task, as  
77 reported earlier <sup>8</sup>, our method reaching the highest correlation of 0.105 between predictions and  
78 observations. Nevertheless, the usefulness of including multiple  $G \times E$  interaction terms and non-  
79 linear interactions between environmental covariates became evident from our results. We expect  
80 that gains from modelling  $G \times E$  will increase in the future as more data, representing further loca-  
81 tions and years, will allow more accurately distinguishing the interactions from the main effects.  
82 Other ways to improve the predictions include using more detailed genomic modeling, e.g. using  
83 Gaussian and other kernels for summarizing the SNP data.

84 Besides targeted breeding, there are several other needs for  $G \times E$  prediction models. They  
85 could mitigate the problems of conventional breeding: accounting for historical weather in the  
86 actual target population of environments can help prevent overfitting to the conditions in the few  
87 field trials performed, as discussed in detail in SI Gains from modelling  $G \times E$  for current target  
88 population of environments. The assumption of the match between field trials and actual growing

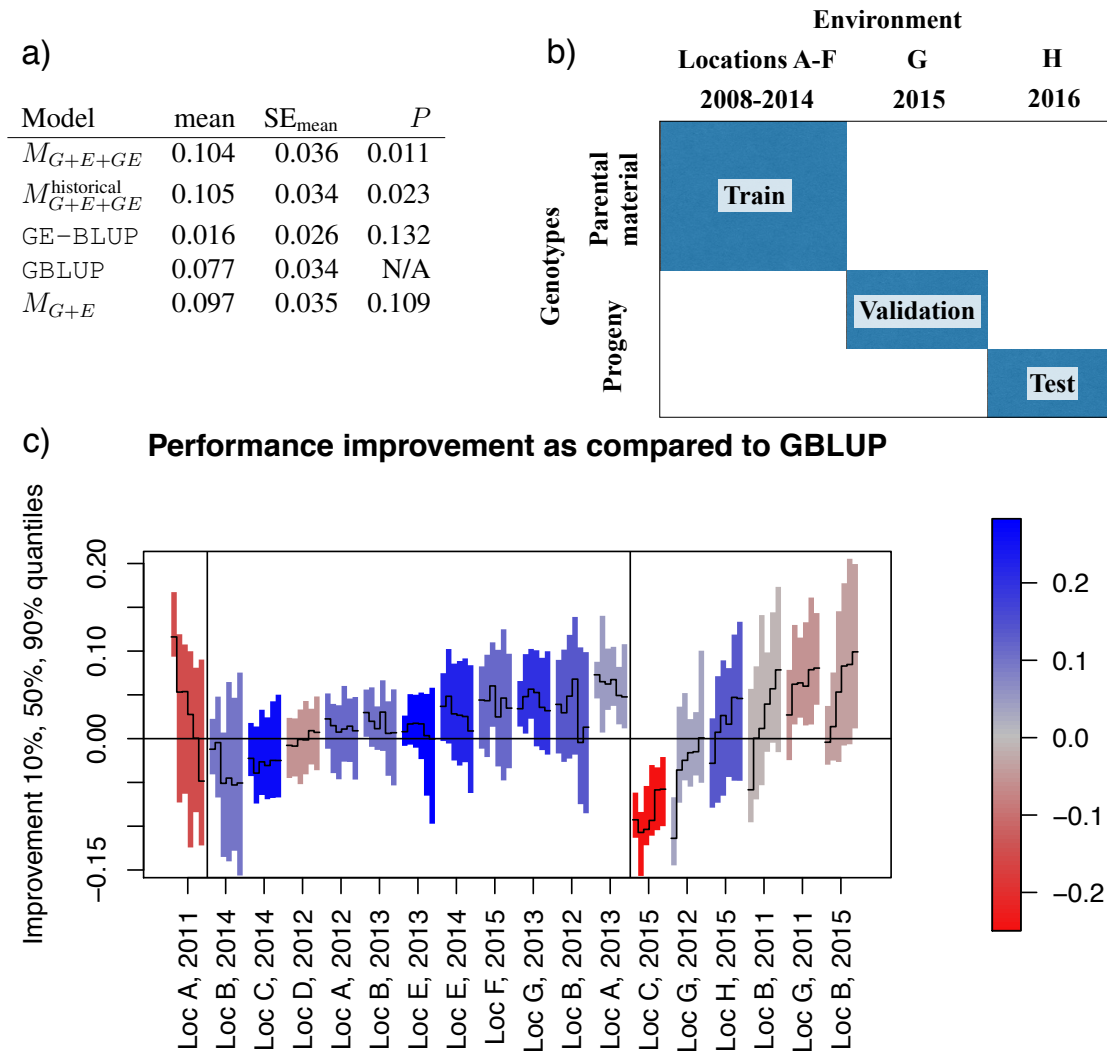

Figure 2: Predicting  $G \times E$  with historical weather information improves genomic prediction accuracy in strictly new environments. **a)** Comparison of prediction accuracies; *mean*: correlation between predicted and observed yields, averaged across test environments;  $SE_{\text{mean}}$ : standard error of the mean;  $P$ : p-value compared to the industry standard (GBLUP). **b)** Outline of the *in silico* setup for comparing methods. **c)** Sensitivity analysis: the difference in prediction accuracies (y-axis) between  $G \times E$  prediction with historical data ( $M_{G+E+GE}^{\text{hist}}$ ) and the industry standard (GBLUP) is shown in 18 different environments (x-axis); values above the horizontal line mean that  $M_{G+E+GE}^{\text{hist}}$  is more accurate. Six vertical bars are shown for each environment, representing variability in results (median and 90 % confidence intervals). Starting from the left, they correspond to models with 0, 1, 2, 3, 4 or 5  $G \times E$  interaction terms (0 corresponds to the  $M_{G+E}$  model). The color indicates the performance of GBLUP in the environment, red meaning GBLUP performed poorly (Loc C, 2015 were omitted from the comparison as all methods performed poorly there). Vertical lines divide the environments into three groups:  $G \times E$  decreased: including  $G \times E$  terms to the model decreased performance;  $G \times E$  neutral: 10 environments where  $G \times E$  terms had neutral effect;  $G \times E$  increased: 6 environments where performance increased by adding more  $G \times E$  terms.

89 locations is equally crucial for the official variety trials for value of cultivation and use (VCU),  
90 required in most countries to evaluate new varieties.  $G \times E$  models are also needed in assessing the  
91 effects of climate change and to select for varieties that react favourably to the altering conditions  
92 <sup>1</sup>. For this purpose, the historical weather observations in  $M_{G+E+GE}^{\text{hist}}$  can be replaced with climate  
93 simulations to assess the performance of varieties under various climate scenarios. To summarise,  
94 we showed that  $G \times E$  prediction in the setup required by targeted breeding, where the environ-  
95 ments are strictly new and predictions are based on historical weather data available at the time of  
96 prediction, improves prediction accuracy significantly compared to the industry standard, which is  
97 needed to accelerate the implementation of targeted breeding.

## 98 **Methods**

99 **Data** All data used in the experiment come from a barley breeding program in Finland, which is  
100 a part of a larger population of target environments for barley as varieties used in Finland are also  
101 used in other Nordic countries. The phenotype consists of (z-transformed) yield measurements  
102 (kg/ha) for 2,244 lines observed in trials at 11 locations across the 4 southernmost growth zones  
103 in Finland from 2008 to 2015. The total number of observed *location*  $\times$  *year* combinations is  
104 35. In some locations, trials have been performed on several years and several fields with varying  
105 soil properties, and a total of 12,277 yield observations have been recorded. The number of ob-  
106 servations per genetic line ranges from 1 to 118 (median 4). The lines were genotyped with the  
107 Illumina 9k iSelect SNP Chip, SNPs with minor allele frequency (MAF)  $< 0.05$  or with  $> 5\%$   
108 values missing were omitted. Also all genotypes with  $> 5\%$  of SNPs missing were omitted. The

109 final proportion of missing genotype data is 0.002.

110 The soil characteristics for each field block are measured in terms of the proportions of sand,  
111 silt and clay (*soil classification triangle*<sup>14</sup>) and the proportion of organic content. Meteorological  
112 information consists of daily averages of temperature and rainfall, and the distances to the closest  
113 meteorological station range from 1 to 40 km (average 13.5 km). The baseline approach GE-BLUP  
114 <sup>8</sup> requires summarising the weather information per crop stage: vegetative (from sowing to visible  
115 awns), heading time (from visible awns to the end of anthesis), and grain filling (from the end  
116 of anthesis to maturity). The times of the crop stages are estimated using temperature sum accu-  
117 mulation; the details are given in Section Comparison methods. In the weather observations, the  
118 proportion of missing values in daily average temperature and rainfall measurements is < 0.0015  
119 (max 3 missing values/environment) and < 0.0032 (max 2 missing values/environment), respec-  
120 tively.

121 **Experimental setup.** To study prediction accuracy, we use a setup that strictly imposes the  
122 realistic constraints related to modelling  $G \times E$  in targeted breeding for new locations. Predictions  
123 are required for new locations (not part of the experimental grid) and for years for which no phe-  
124 notype data are available (to mimic future growth seasons). Additionally, predictions are needed  
125 for the offspring of the lines in the training set, which have no phenotype data observations. More  
126 details with a summary of the differences between our setup and earlier works are given in SI  
127 Details of experimental setup. We measure prediction accuracy using cross-validation, where the  
128 training, validation and test sets are selected to enforce the realistic constraints (Figure 2c). As the



129 performance measure for prediction accuracy, we follow the conventional approach, i.e., the Pear-  
130 son correlation between the predicted and observed yields in the test set <sup>8,10-12</sup>. This correlation  
131 is computed for each cross-validation fold in turn, and averaged over the test cases. Similarly to  
132 Malosetti et al. <sup>8</sup>, the test case -specific correlations are transformed into Fisher's z-scores before  
133 averaging and back-transformed to obtain the final results. We regress the  $G \times E$  interactions on  
134 the average characteristics of the growing season: for each yield trial, we use the weather obser-  
135 vations from the typical growing season (1<sup>st</sup> of May until end of August) regardless of the sowing  
136 date. This indirect approach allows predicting with historical weather data. When predicting with  
137 historical data, the prediction for each genotype is made for each year for which historical weather  
138 observations are available, and the median of those is used as the final predicted value.

139 We also carry out a sensitivity analysis that allows studying the impact of modelling assump-  
140 tions, such as inclusion of  $G \times E$  interaction components to the model. In detail, the sensitivity  
141 analysis shows variability (median and 90% interval) in the predictive performance in a given  
142 environment (location, year combination) when we vary *i*) the hyperparameter values over their  
143 specified ranges, *ii*) the genotype sets that we are predicting, and *iii*) the training set by removing  
144 any single training environment.

145 **Model.** In the models  $M_{G+E}$ ,  $M_{G+E+GE}$  and  $M_{G+E+GE}^{\text{hist}}$  we assume that *i*) the yield  $y_{ij}$  of  
146 genotype  $i$  in environment  $j$  is affected by the genotype, the environmental conditions through-  
147 out the growing season and the interactions between the two. We assume that *ii*) the response to  
148 the environmental properties is non-linear and that *iii*) it may involve interactions between differ-

149 ent environmental properties. For instance, temperature/rainfall either too low or too high reduces  
150 yield, and the response to rainfall is also affected by the soil type. We further assume that *iv*) the re-  
151 sponses to the environmental conditions are highly polygenic. Assumptions *i-iv* are encoded using  
152 the *kernel trick* <sup>15</sup>, in which covariate data are represented as similarities, or kernels, between dif-  
153 ferent data items. Kernel methods are a computationally effective way to model non-linearities and  
154 interactions and they have been applied to breeding data <sup>16</sup>. An additional complication in the data  
155 is the low number of observed trials compared to the complexity of the problem. To handle this, we  
156 constrain our model to only learn the most prominent combinations of environmental conditions  
157 affecting yield, by assuming a low-rank approximation for the model parameters accounting for the  
158  $G \times E$  effects. Finally, we follow the Bayesian statistical framework <sup>17</sup>, and regularise the model  
159 by placing priors on all parameters, which alleviates overfitting to the training data and improves  
160 prediction accuracy in the test data.

161 Mathematically, the model for yield is formulated as

$$y_{ij} = g_i + e_j + \xi_{ij} + \epsilon_{ij}, \quad i = 1, \dots, N_g, j = 1, \dots, N_e, \quad (1)$$

162 where  $g_i$  is the genetic main effect,  $e_j$  is the environmental effect,  $\xi_{ij}$  is the effect that arises from  
163 interaction between genotype  $i$  and environment  $j$ ,  $\epsilon_{ij}$  is noise distributed as  $N(0, \sigma_j^2)$ , and  $N_g$  and  
164  $N_e$  are the numbers of genotypes and environments. The genetic main effect  $g_i$  is modeled as a  
165 linear function of the genomic covariates. In detail, the model for the vector of genetic main effects

166  $\mathbf{g}^* = (g_1, \dots, g_{N_g})^T$  is given in terms of a linear genomic kernel  $K_g$  by

$$\underset{N_g \times 1}{\mathbf{g}^*} = \underset{N_g \times N_g}{K_g} \cdot \underset{N_g \times 1}{\mathbf{a}_{g0}} + \underset{N_g \times 1}{\mathbf{e}_{g0}}, \quad (2)$$

167 where  $\mathbf{a}_{g0}$  are kernel regression weights and  $\mathbf{e}_{g0}$  is the noise vector with elements distributed inde-  
 168 pendently as  $N(0, \sigma_{g0}^2)$ . The dimension of each matrix is shown in equation (2) below the corre-  
 169 sponding matrix symbol. The genomic kernel  $K_g$  is computed by first concatenating the genomic  
 170 covariates  $\mathbf{g}_i$  as the rows of a matrix  $\mathbf{G}$  and then using the standard linear kernel,  $K_g = \mathbf{G}\mathbf{G}^T$ .

171 The environmental main effect  $e_j$  in equation (1) is modeled as a random effect,

$$e_j \sim N(0, \sigma_{e0}^2), \quad j = 1, \dots, N_e.$$

172 The  $G \times E$  terms  $\xi_{ij}$  are modelled as non-linear functions of the genomic and environmental  
 173 covariates,  $\mathbf{g}_i$  and  $\mathbf{e}_j$ . Each environment and genotype is first represented by  $R$  latent variables.  
 174 The interactions  $\xi_{ij}$  are modelled as the inner product of the latent variable vectors corresponding  
 175 to genotype  $i$  and environment  $j$ , that is,

$$\xi_{ij} = \sum_{r=1}^R h_{ir}^g \cdot h_{jr}^e, \quad i = 1, \dots, N_g, j = 1, \dots, N_e. \quad (3)$$

176 Here,  $h_{ik}^g$  is the  $k$ th latent variable for the  $i$ th genotype, and  $h_{jk}^e$  is the  $k$ th latent variable for the  $j$ th

177 environment. Using matrix notation, equation (3) can be written as

$$\Xi_{N_g \times N_e} = \begin{matrix} H_g & \cdot & H_e^T \\ N_g \times R & & R \times N_e \end{matrix}, \quad (4)$$

178 where  $\Xi = [\xi_{ij}]$  is the matrix of interaction terms, and  $H_g = [h_{ij}^g]$  and the  $H_e = [h_{ij}^e]$  are matri-  
 179 ces having as their rows the  $R$ -dimensional latent variable representations for each genotype and  
 180 environment, respectively.

The latent variables  $H_g$  and  $H_e$  are obtained from genotype and environment kernels  $K_g$  and  $K_e$ :

$$\begin{aligned} H_g &= \begin{matrix} K_g & \cdot & A_g & + & E_{H_g} \\ N_g \times R & & N_g \times N_g & & N_g \times R & & N_g \times R \end{matrix} \quad \text{and} \\ H_e &= \begin{matrix} K_e & \cdot & A_e & + & E_{H_e} \\ N_e \times R & & N_e \times N_e & & N_e \times R & & N_e \times R \end{matrix}, \end{aligned}$$

181 where  $A_g$  and  $A_e$  are kernel regression weights, and  $E_{H_g}$  and  $E_{H_e}$  are matrices containing error  
 182 terms distributed independently as  $N(0, \sigma_g^2)$  or  $N(0, \sigma_e^2)$ , respectively. The environmental ker-  
 183 nel  $K_e$  is obtained by combining multiple kernels  $K_e^1, \dots, K_e^E$ , computed from environmental data  
 184  $\mathbf{e}_j, j = 1, \dots, N_e$ , each kernel representing a different aspect of the environment (weather, soil,  
 185 etc). Details about processing the raw data into kernels and about combining multiple environmen-  
 186 tal kernels into a single kernel are presented in SI Data processing and kernels.

187 For inference we use variational approximation<sup>18</sup>, which is a computationally feasible way  
 188 to approximate posterior distributions of parameters in complex models. The variational updates

189 required here can be derived similarly to Gönen et al. <sup>5</sup>, except that we have extended their model  
190 and algorithm by including the genotype and environment main effects, i.e., the terms  $g_i$  and  $e_j$   
191 in equation (1). Detailed distributions of the model parameters and the guidelines for specifying  
192 hyperparameter values are given in Sections SI Detailed model specification and SI Specifying  
193 hyperparameter values, respectively. Further details about the inference algorithm in SI Details of  
194 the variational inference algorithm.

195 **Comparison methods.** The mixed model computations for the comparison methods GBLUP  
196 and GE-BLUP are performed using the R library `rBLUP` <sup>19</sup>. For both methods, fixed effects  
197 were used to account for field block-specific effects, corresponding to the terms  $e_j$  in  $M_{G+E+GE}^{\text{hist}}$ ,  
198  $M_{G+E+GE}$  and  $M_{G+E}$ . For GBLUP, the genomic kernel (see Section Model) was used as the  
199 covariance matrix  $\Sigma$ . For GE-BLUP, the environmental kinship model (GE-KE) <sup>8</sup>, is used and the  
200 full covariance matrix  $\Sigma$  is generated through the Kronecker product  $\Sigma = \Sigma_G \otimes \Sigma_E$ , where  $\Sigma_G$   
201 and  $\Sigma_E$  are the genetic and environmental covariance matrices, respectively. The environmental  
202 covariance matrix  $\Sigma_E$  is generated from the available environmental data to describe soil properties  
203 and the growth conditions during the vegetative, heading time and grain filling developmental  
204 stages. All soil data and growth zone information are used as such whereas the daily average  
205 temperature and rainfall measurements are summarised as the mean and the standard deviation of  
206 the daily observations per crop stage. The growth periods are estimated using the sowing date  
207 and temperature sum accumulation-based estimates of heading and ripening times (440.2 °C and  
208 905.9 °C, respectively), which were estimated from external breeding data. The vegetative stage  
209 is assumed to last 3 weeks starting from sowing, the time of heading is assumed to start 2 weeks

210 before and last 1 week after the estimated heading time and grain filling was assumed to start  
211 after heading and to last 1 week longer than the estimated time of ripening. Wide estimates for the  
212 growth periods were used to account for varying growth speeds. The resulting set of environmental  
213 covariates is z-normalized and a linear kernel is used, which is further normalized according to  
214 equation (()) in SI Data preprocessing and kernels.

### 215 **Data availability**

216 The data accompanied by the method code will be made available upon publication in the form of  
217 kernels to allow reproducing the results.

### 218 **Acknowledgements**

219 We acknowledge Boreal Plant Breeding Ltd for the access to the plant breeding data and we grate-  
220 fully thank Outi Manninen, Mika Isolahti and Esa Teperi for very helpful comments. This work  
221 was in part funded by Tekes, the Finnish Funding Agency for Innovation (Dnro 1718/31/2014 to  
222 J.G, H.M and S.K) and the Academy of Finland (Finnish Centre of Excellence in Computational  
223 Inference Research COIN, and grant numbers 294238, 292334 to SK and grant numbers 286607  
224 and 294015 to P.M.).

225 **Author contributions**

226 J.G. processed the data from Boreal Plant Breeding Ltd and performed the *in silico* experiments.

227 J.G. and P.M. implemented the method. All authors were involved in the conception and design of

228 the study, analyzed the results and assisted with drafting and critically revising the manuscript.

229 **Competing interests**

230 The authors declare no competing financial interests.

- 232 1. Tester M, Langridge P (2010) Breeding Technologies to Increase Crop Production in a Chang-  
233 ing World. *Science* 327(5967):818–822.
- 234 2. Braun HJ, Rajaram S, Ginkel M (1996) Cimmyt’s approach to breeding for wide adaptation.  
235 *Euphytica* 92(1):175–183.
- 236 3. Schein AI, Popescul A, Ungar LH, Pennock DM (2002) Methods and Metrics for Cold-start  
237 Recommendations in *Proceedings of the 25th Annual International ACM SIGIR Conference*  
238 *on Research and Development in Information Retrieval, SIGIR ’02*. (ACM, New York, NY,  
239 USA), pp. 253–260.
- 240 4. Costello JC, et al. (2014) A community effort to assess and improve drug sensitivity prediction  
241 algorithms. *Nature biotechnology* 32(12):1202–1212.
- 242 5. Gönen M, Kaski S (2014) Kernelized Bayesian Matrix Factorization. *IEEE Transactions on*  
243 *Pattern Analysis and Machine Intelligence* 36(10):2047–2060.
- 244 6. Jarquín D, et al. (2014) A reaction norm model for genomic selection using high-dimensional  
245 genomic and environmental data. *Theoretical and Applied Genetics* 127(3):595–607.
- 246 7. Heslot N, Akdemir D, Sorrells ME, Jannink JL (2014) Integrating environmental covariates  
247 and crop modeling into the genomic selection framework to predict genotype by environment  
248 interactions. *Theoretical and Applied Genetics* 127(2):463–480.
- 249 8. Malosetti M, Bustos-Korts D, Boer MP, van Eeuwijk FA (2016) Predicting responses in mul-  
250 tiple environments: issues in relation to genotype × environment interactions. *Crop Science*  
251 56(5):2210–2222.



- 252 9. Meuwissen THE, Hayes BJ, Goddard ME (2001) Prediction of Total Genetic Value Using  
253 Genome-Wide Dense Marker Maps. *Genetics* 157(4):1819–1829.
- 254 10. Burgueño J, de los Campos G, Weigel K, Crossa J (2012) Genomic prediction of breeding val-  
255 ues when modeling genotype× environment interaction using pedigree and dense molecular  
256 markers. *Crop Science* 52(2):707–719.
- 257 11. Albrecht T, et al. (2014) Genome-based prediction of maize hybrid performance across genetic  
258 groups, testers, locations, and years. *Theoretical and Applied Genetics* 127(6):1375–1386.
- 259 12. Saint Pierre C, et al. (2016) Genomic prediction models for grain yield of spring bread wheat  
260 in diverse agro-ecological zones. *Scientific Reports* 6:27312.
- 261 13. de los Campos G, Hickey JM, Pong-Wong R, Daetwyler HD, Calus MPL (2013) Whole-  
262 Genome Regression and Prediction Methods Applied to Plant and Animal Breeding. *Genetics*  
263 193(2):327–345.
- 264 14. Shepard FP (1954) Nomenclature based on sand-silt-clay ratios. *Journal of Sedimentary*  
265 *Petrology* 24(3):151–158.
- 266 15. Shawe-Taylor J, Cristianini N (2004) *Kernel methods for pattern analysis*. (Cambridge Uni-  
267 versity Press).
- 268 16. Gianola D, Morota G, Crossa J (2014) Genome-enabled prediction of complex traits with  
269 kernel methods: What have we learned? in *Proceedings, 10th World Congress of Genetics*  
270 *Applied to Livestock Production*. p. 6.

- 271 17. Gelman A, et al. (2013) Bayesian data analysis, 3rd edition.
- 272 18. Beal MJ (2003) *Variational algorithms for approximate Bayesian inference*. (Gatsby Compu-  
273 tational Neuroscience Unit, University College London).
- 274 19. Endelman JB (2011) Ridge Regression and Other Kernels for Genomic Selection with R Pack-  
275 age rrBLUP. *The Plant Genome* 4(3):250–255.
- 276 20. Gönen M (2012) Bayesian Efficient Multiple Kernel Learning. *Proc. 29th International Con-  
277 ference on Machine Learning, ICML 2012* pp. 1–8.

278 **Supplementary Information (SI)**

279 **Data preprocessing and kernels.** A summary of different kernels, including transformations  
280 specific to each data source, preprocessing and kernel transformations used, is given in Table S 1.  
281 The bandwidth parameter of all the Gaussian kernels is set to the conventional default value equal  
282 to the number of covariates used to compute the kernel. All kernels  $K$  are normalized to make  
283 them unit diagonal:

$$\tilde{K} = (\mathbf{d}^{-1/2} \times \mathbf{d}^{-1/2}) \cdot K \quad (1)$$

284 where  $\mathbf{d}$  is a vector of the diagonal values of kernel  $K$ ,  $\times$  denotes the outer product, and the  
285  $\mathbf{d}^{-1/2}$  denotes a vector with all elements of  $\mathbf{d}$  raised to the power of  $-1/2$ . The interaction kernel  
286 between the soil type and rainfall is computed from other kernels as

$$K_{\text{soil} \times \text{rain}} = \tilde{K}_{\text{soil, Gaussian}} \odot \tilde{K}_{\text{rain, Gaussian}}, \quad (2)$$

287 where  $\odot$  denotes the Hadamard (elementwise) product. Finally, all kernels are normalized with  
288 respect to their summed total variance by multiplication with a constant  $c$

$$\tilde{\tilde{K}} = c \cdot \tilde{K} \quad (3)$$

289 where  $c = \left[ \sum_{i=1}^{N_z} \text{Var}(\tilde{\mathbf{k}}_i) \right]^{-1/2}$  and  $\tilde{\mathbf{k}}_i$  is the  $i$ th column of  $\tilde{K}$ . The motivation for this normalisa-  
290 tion comes from the expectation that *a priori* each kernel explains the same amount of variance,  
291 and, when combining the kernels as described below, this prior expectation is realised by the nor-

292 malisation.

293 **Combining environmental kernels.** The final environmental kernel  $K_e$  is obtained as a  
294 weighted sum of the different normalized ( $\tilde{K}$ ) kernels in Table S 1. The weights are learnt from the  
295 training data by fitting BEMKL<sup>20</sup>, a multiple kernel learning regression method, using experiment-  
296 specific yield means as the target variable. For BEMKL, shape ( $\alpha$ ) and scale ( $\beta$ ) parameter values  
297 for the prior Gamma distributions are set to 1 except for the  $\lambda$  parameter, for which the scale is  
298 fixed to 10, providing stronger regularization. Regression bias term  $b$  is set to 0. For further details  
299 of BEMKL, see Gönen et al.<sup>20</sup>. Before combining the kernels, the learnt weights are normalized  
300 such that their sum of squares is equal to 1, and the largest weight (in absolute value) is positive.  
301 The distributions of the normalised kernel weights from the sensitivity analysis are presented in  
302 Figure S 3. The composite kernel  $K_e$  is again normalized according to equation (3).

303 **Detailed model specification.** The distributional assumptions of the model are

$$y_{ij}|H_g, H_e, g_i, e_j, \sigma_j^2 \sim \mathcal{N}(g_i + e_j + (\mathbf{h}_i^g)^T \mathbf{h}_j^e, \sigma_j^2), \quad \forall(i, j)$$

$$\sigma_j^{-2} \sim \mathcal{G}(\alpha_j, \beta_j), \quad \forall(j)$$

$$a_i^{g0}|\lambda_{g0} \sim \mathcal{N}(0, \lambda_{g0}^{-1}), \quad \forall(i)$$

$$g_i|\mathbf{a}_{g0}, K_g, \sigma_{g0}^2 \sim \mathcal{N}(\mathbf{a}_{g0}^T \mathbf{k}_i^g, \sigma_{g0}^2), \quad \forall(i)$$

$$a_{ij}^g|\lambda_g \sim \mathcal{N}(0, \lambda_g^{-1}), \quad \forall(i, j)$$

| Variable (unit)                                      | transformation                         | preprocessing parameters                                                                                        | missing value imputation | kernel transformation(s) |
|------------------------------------------------------|----------------------------------------|-----------------------------------------------------------------------------------------------------------------|--------------------------|--------------------------|
| Soil content (%,<br>$N_{covs} = 3$ )                 | log transformation                     | z-normalization                                                                                                 | (none)                   | linear and Gaussian      |
| Soil organic content (%,<br>$N_{covs} = 3$ )         | log transformation                     | z-normalization                                                                                                 | (none)                   | Gaussian                 |
| daily rainfall (mm,<br>$N_{covs} = 123$ )            | 7-day moving average (6 previous days) | z-normalization with 3 <sup>rd</sup> order polynomial smoothing                                                 | 0-imputation             | linear and Gaussian      |
| daily average temperature (C°,<br>$N_{covs} = 123$ ) |                                        | z-normalization with 3 <sup>rd</sup> order polynomial smoothing of daily mean/scale parameters                  | 0-imputation             | linear and Gaussian      |
| growth zone (1-4,<br>$N_{covs} = 1$ )                |                                        | z-normalization                                                                                                 | (none)                   | Gaussian                 |
| genotype markers (SNPs,<br>$N_{covs} = 5696$ )       |                                        | Minor allele frequency scaling for SNP A:<br>$\frac{A - 2 \cdot MAF_A}{\sqrt{2 \cdot MAF_A \cdot (1 - MAF_A)}}$ | mean imputation          | linear kernel            |

Table S 1: Preprocessings and kernel functions applied to covariates.

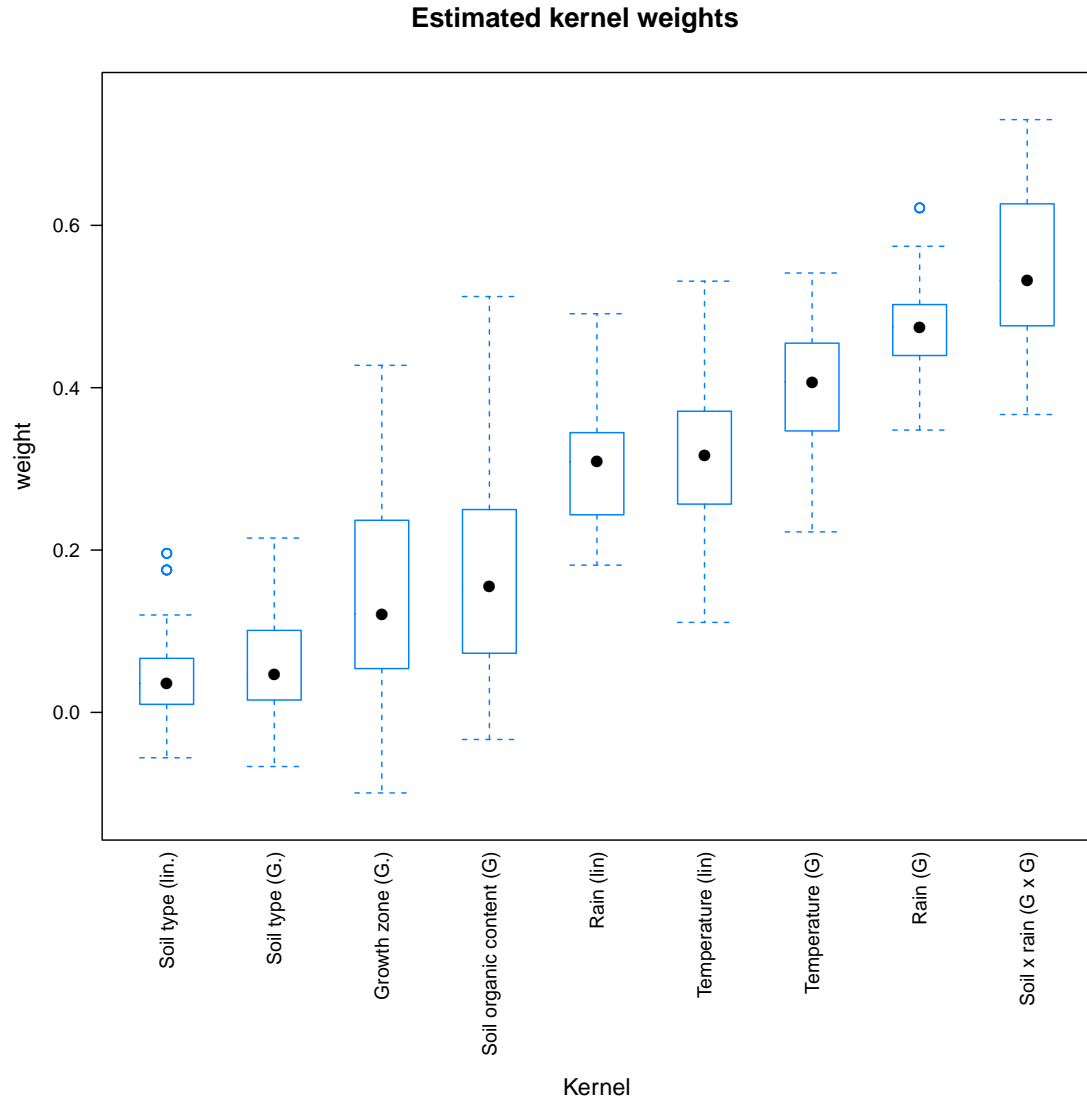

Figure S 3: Estimated normalized kernel weights in the sensitivity analysis.

$$h_{ij}^g | A_g, K_g, \sigma_g^2 \sim \mathcal{N}((\mathbf{k}_i^g)^T \mathbf{a}_j^g, \sigma_g^2), \quad \forall(i, j)$$

$$e_j | \sigma_{e0}^2 \sim \mathcal{N}(0, \sigma_{e0}^2), \quad \forall(j)$$

$$a_{ij}^e | \lambda_e \sim \mathcal{N}(0, \lambda_e^{-1}), \quad \forall(i, j)$$

$$h_{ij}^e | A_e, K_e, \sigma_e^2 \sim \mathcal{N}((\mathbf{k}_i^e)^T \mathbf{a}_j^e, \sigma_e^2), \quad \forall(i, j),$$

304 where  $\mathbf{k}_i^g, \mathbf{k}_j^e, \mathbf{a}_j^g, \mathbf{a}_j^e$ , denote columns of matrices  $K_g, K_e, A_g, A_e$ , with subscripts  $i$  and  $j$  specifying  
305 the column index;  $\mathbf{h}_i^g$  and  $\mathbf{h}_j^e$  denote  $i$ th and  $j$ th rows of  $H_g$  and  $H_e$ , represented as column vectors;  
306  $a_i^{g0}$  is the  $i$ th element of vector  $\mathbf{a}_{g0}$ ;  $a_{ij}^g$  and  $a_{ij}^e$  are the  $(i, j)$ th elements in matrices  $A_g$  and  $A_e$ .  $\mathcal{N}$   
307 and  $\mathcal{G}$  denote the Gaussian and Gamma distributions, respectively.

308 **Specifying hyperparameter values.** Prior knowledge about the approximate weights of  
309 different sources of variance, e.g. the relative weight of genetic and environmental main effects, is  
310 used to specify hyperparameter values. We determine for each hyperparameter either a single fixed  
311 value or a grid of values to be selected from by cross-validation. Parameters  $(\alpha_j, \beta_j)$  of the Gamma  
312 distribution for environment-specific residual noise variances  $\sigma_j^2$  are set to  $(10, 1)$ , corresponding  
313 to an expected value of approximately 0.1 for  $\sigma_j^2$ . The variance of environment mean effects  $\sigma_{e0}^2$  is  
314 fixed to 0.25. To set the parameters  $\lambda_{g0}$  and  $\sigma_{g0}^2$  that determine the amount of signal and noise in  
315 the genetic main effects, we find values for them such that two conditions are satisfied. First, 95%  
316 of the variance of the genetic effects  $\mathbf{g}^*$  is assumed to be signal, that is,

$$\frac{\text{Var}(K_g \cdot \mathbf{a}_{g0})}{\text{Var}(K_g \cdot \mathbf{a}_{g0}) + \sigma_{g0}^2} = 0.95.$$

317 The second condition is that the variance of the genetic main effects,  $\text{Var}(K_g \cdot \mathbf{a}_{g0}) + \sigma_{g0}^2$ , is either  
318 0.2, 0.4, or 0.6. In practice we find these values for  $\sigma_{g0}^2$  and  $\lambda_{g0}$  by simulating multiple realisations  
319 from the model with specific values for the parameters, and select values that on average satisfy  
320 the two conditions.

The parameters  $\lambda_g, \sigma_g^2, \lambda_e$ , and  $\sigma_e^2$ , controlling the proportion of signal and noise in the la-

tent components  $H_g$  and  $H_e$  that model the  $G \times E$  interactions, are selected according to similar principles: by inspecting the proportion of signal of the total variance of the latent factors and the relative contribution of the interaction terms compared to the genetic main effects. In detail, we assume first that

$$\frac{\text{Tr}(\text{Var}(K_g \cdot A_g))}{\text{Tr}(\text{Var}(K_g \cdot A_g)) + R\sigma_g^2} = 0.95, \text{ and}$$

$$\frac{\text{Tr}(\text{Var}(K_e \cdot A_e))}{\text{Tr}(\text{Var}(K_e \cdot A_e)) + R\sigma_e^2} = 0.95,$$

321 where  $\text{Tr}()$  denotes the trace of a matrix. Second, we assume that the total variance of the interac-  
 322 tions is either the same or half of the total variance from the genetic main effects, i.e.

$$\text{Tr}(\text{Var}(H_g \cdot H_e^T)) = \Phi \times R \times [\text{Var}(K_g \cdot \mathbf{a}_{g0}) + \sigma_{g0}^2],$$

323 where  $\Phi$  is either 0.5 or 1, to be selected with cross-validation.

324 **Details of the variational inference algorithm.** For short-hand, the hyper-parameters in the  
 325 model are denoted jointly by

$$\zeta = \{\alpha_j, \beta_j, \sigma_{g0}^2, \sigma_{e0}^2, \sigma_g^2, \sigma_e^2, \lambda_{g0}, \lambda_g, \lambda_e\},$$

326 and the parameters by

$$\Theta = \{\mathbf{a}_{g0}, A_g, A_e, H_g, H_e, \mathbf{g}^*, \mathbf{e}^*, \sigma_*^2\},$$



327 where  $\sigma_*^2 = (\sigma_1^2, \dots, \sigma_{N_e}^2)$ . In the following the dependence on  $\zeta$  is omitted for clarity. We assume  
 328 the factorized variational approximation

$$p(\Theta|K_g, K_e, Y) \approx q(\Theta) = q(\mathbf{a}_{g0})q(A_g)q(A_e)q(H_g)q(H_e)q(\mathbf{g}^*)q(\mathbf{e}^*)q(\sigma_*^2)$$

and define each factor in the ensemble just like its full conditional:

$$\begin{aligned} q(\mathbf{a}_{g0}) &= \mathcal{N}(\mathbf{a}_{g0}; \mu(\mathbf{a}_{g0}), \Sigma(\mathbf{a}_{g0})) \\ q(A_g) &= \prod_{r=1}^R \mathcal{N}(\mathbf{a}_r^g; \mu(\mathbf{a}_r^g), \Sigma(\mathbf{a}_r^g)) \\ q(A_e) &= \prod_{r=1}^R \mathcal{N}(\mathbf{a}_r^e; \mu(\mathbf{a}_r^e), \Sigma(\mathbf{a}_r^e)) \\ q(H_g) &= \prod_{i=1}^{N_g} \mathcal{N}(\mathbf{h}_i^g; \mu(\mathbf{h}_i^g), \Sigma(\mathbf{h}_i^g)) \\ q(H_e) &= \prod_{j=1}^{N_e} \mathcal{N}(\mathbf{h}_j^e; \mu(\mathbf{h}_j^e), \Sigma(\mathbf{h}_j^e)) \\ q(\mathbf{g}^*) &= \prod_{i=1}^{N_g} \mathcal{N}(g_i; \mu(g_i), \Sigma(g_i)) \\ q(\mathbf{e}^*) &= \prod_{j=1}^{N_e} \mathcal{N}(e_j; \mu(e_j), \Sigma(e_j)) \\ q(\sigma_*^2) &= \prod_{j=1}^{N_e} \mathcal{G}(\sigma_j^{-2}; \alpha(\sigma_j^{-2}), \beta(\sigma_j^{-2})). \end{aligned}$$

329 The parameters in the factor distributions can be derived as by Gönen et al <sup>5</sup>, and they are therefore  
 330 omitted from here.

331 **Initialisation of the variational algorithm.** The parameter  $\mathbf{g}^*$  was initialised to the main

332 genetic effects learnt by GBLUP, and  $\mathbf{e}^*$  was initialised to the average yields in the different en-  
333 vironments. Parameters  $H_g$  and  $H_e$  were initialised by applying the regularized Singular Value  
334 Decomposition (SVD) implemented in R library `softImpute` to the yield matrix  $Y$  after re-  
335 gressing out the initialised main effects  $\mathbf{g}^*$  and  $\mathbf{e}^*$ . Parameters  $\mathbf{a}_{g0}$ ,  $A_g$  and  $A_e$  were initialised to  
336 0. Environment-specific residual variance parameters  $\sigma_*^2$  were initialised to environment-specific  
337 sample variances.

338 **Details of experimental setup.** Different prediction tasks, distinguished by the availability  
339 of different data types, are presented in Figure S4. Setups 1-4 correspond to those studied by  
340 Malosetti et al. <sup>8</sup>: in setup 1, phenotype measurements are available for the genotypes and envi-  
341 ronments to be predicted, and both genotypes and environmental covariates are fully observed. In  
342 setups 2 and 3, phenotype measurements are still available but only for the genotypes or the envi-  
343 ronments to be predicted, but not both, and covariates are fully observed. In setup 4, no phenotype  
344 data are available for environments/genotypes to be predicted, but both genetic and environmental  
345 covariates are still fully observed.

346 Two additional setups can be considered. In setups 5 and 6 environmental covariates from the  
347 environments of interest are only partially available: location and soil characteristics are known but  
348 the in-season weather measurements are not available for the year of interest. However, historical  
349 observations for the same locations are available and they are used to estimate the performance of  
350 each genotype. Setups 5 and 6 differ depending on whether phenotype measurements are available  
351 from some other environment for the genotypes (5) or not at all (6). The results in this paper are for

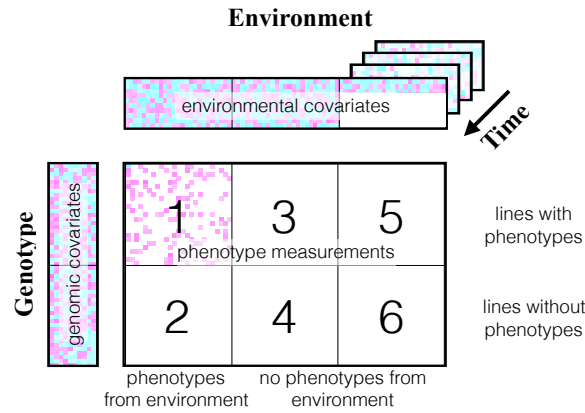

Figure S4: Comparison of prediction setups with respect to the availability of phenotype data and the genomic and environmental covariates as presented by Malosetti et al <sup>8</sup>. White colour indicates missing value. In setups 1, 3 and 5, "lines with phenotypes", the lines to be predicted have phenotype observations (from some environments). In setups 1 and 2, "phenotypes from environment", phenotypes have been measured from the prediction target environments (for some lines). In setups 1-4 presented by Malosetti et al <sup>8</sup>, environmental covariates are available for all environments, whereas in the new setups 5 and 6, environmental covariates from the trials of interest are missing and they are replaced by using several years of historical data.

352 setup 6 where no phenotype data are available for any of the lines of interest. We emphasize that  
 353 a further difference to earlier work <sup>8</sup> is that we strictly require the test environments to be simul-  
 354 taneously both from a location and from a year not included among the training environments and  
 355 that the genotypes in the test/validation sets are from the progeny of the training set. A summary  
 356 of the differences between our setup to those presented by earlier works is given in Table S 2

357 **Gains from modelling  $G \times E$  for current target population of environments.** Our results  
 358 indicate targeted breeding could improve yields by dividing a single target population of environ-  
 359 ments (TPE) into several parts, but the same methodology could be used even when developing  
 360 only 1 variety for a larger population of target environments as in traditional breeding. Traditional  
 361 breeding makes the implicit assumption that varieties' observed yields  $g \in 1, \dots, G$  in trial exper-  
 362 iments in environments (location  $\times$  year)  $e \in 1, \dots, E$ , are representative of the yield in the TPE,

| Publication                                                 | New environment                                                                                                                                                         | New genotypes                                                                                                   |
|-------------------------------------------------------------|-------------------------------------------------------------------------------------------------------------------------------------------------------------------------|-----------------------------------------------------------------------------------------------------------------|
| Burgueño et al. 2012 (CV1/CV2) <sup>10</sup>                | CV1/CV2: test locations and years are present in the location-year combinations in the training data                                                                    | new lines in CV1: not restricted to the offspring generation. In CV2 the test lines have phenotype observations |
| Heslot et al. 2013 <sup>7</sup>                             | Random split, balanced wrt years and locs → year and locations not new                                                                                                  | only 544/2195 genotypes have no phenotype observations, test set not restricted to the offspring generation     |
| Albrecht et al. 2014 <sup>11</sup>                          | the year-location combination is new but the test locations and years are present in other location-year combinations in the training data                              | genotypes are new and from the offspring                                                                        |
| Malosetti et al. 2016 <sup>8</sup>                          | time-structured DTD: 2/6 test locations new according to strict criteria; physically structured DTD: none of the environments are strictly new (as the year is not new) | all genotypes within the same family, not from the next generation.                                             |
| Saint Pierre et al. 2016 <sup>12</sup> (leave-one-side-out) | location new but year part of the training set                                                                                                                          | test lines have phenotype observations                                                                          |

Table S 2: Comparison of the proposed *in silico* setup to the existing setups.

363 in other words

$$p(\text{yield}_g|\text{TPE}) \approx \frac{1}{E} \sum_e p(\text{yield}_g|\text{environment}_e) \quad (4)$$

However, with geographic field use information and weather data widely available, this strong assumption can be replaced with an estimate for the yield in the TPE given the actual fields and their microclimates:

$$p(\text{yield}_g|\text{TPE}) \approx \sum_f^F P_f \times p(\text{yield}_g|f) \quad (5)$$

$$= \sum_f^F P_f \times \int_{\theta_f} p(\text{yield}_g|\theta_f) \times p(\theta_f) d\theta_f, \quad (6)$$

364 where  $f \in 1, \dots, F$ , are fields in the TPE used for cultivation of the new variety,  $\theta_f$  are parameters  
365 (e.g. weather conditions) related to a certain field  $f$ ,  $p(\theta_f)$  is the uncertainty related to these  
366 conditions, estimated from historical records,  $p(\text{yield}_g|\theta_f)$  is the predictive distribution for the  
367 yield under conditions  $\theta_f$ , obtained from the model, and  $P_f$  is the proportion of the total volume  
368 cultivated in field  $f$ .

|    | environment | GBLUP  | $M_{G+E}$ | $M_{G+E+GE}$ | $M_{G+E+GE}^{\text{hist}}$ | GE-BLUP | $N_{\text{test}}$ |
|----|-------------|--------|-----------|--------------|----------------------------|---------|-------------------|
| 1  | Loc B, 2011 | -0.147 | -0.146    | -0.109       | -0.07                      | 0.068   | 59                |
| 2  | Loc A, 2011 | -0.237 | -0.086    | -0.206       | -0.2                       | -0.015  | 59                |
| 3  | Loc G, 2011 | -0.02  | -0.028    | 0.045        | 0.031                      | 0.183   | 58                |
| 4  | Loc B, 2013 | -0.016 | 0.057     | 0.051        | 0.046                      | 0.182   | 182               |
| 5  | Loc A, 2012 | 0.167  | 0.198     | 0.167        | 0.163                      | 0.057   | 106               |
| 6  | Loc G, 2012 | 0.023  | -0.079    | 0.017        | 0.031                      | -0.166  | 106               |
| 7  | Loc D, 2012 | 0.01   | -0.031    | -0.01        | -0.026                     | -0.075  | 105               |
| 8  | Loc E, 2013 | 0.124  | 0.2       | 0.265        | 0.245                      | -0.354  | 91                |
| 9  | Loc B, 2012 | 0.089  | 0.166     | 0.17         | 0.195                      | -0.047  | 106               |
| 10 | Loc G, 2013 | 0.228  | 0.21      | 0.278        | 0.282                      | -0.256  | 91                |
| 11 | Loc B, 2012 | 0.171  | 0.223     | 0.179        | 0.192                      | 0.127   | 260               |
| 12 | Loc A, 2012 | 0.046  | 0.113     | 0.087        | 0.043                      | 0.1     | 243               |
| 13 | Loc E, 2013 | 0.467  | 0.488     | 0.503        | 0.518                      | -0.122  | 153               |
| 14 | Loc G, 2013 | 0.2    | 0.308     | 0.353        | 0.344                      | -0.107  | 152               |
| 15 | Loc C, 2014 | 0.208  | 0.197     | 0.068        | 0.045                      | 0.054   | 79                |
| 16 | Loc B, 2013 | 0.267  | 0.309     | 0.291        | 0.225                      | 0.147   | 153               |
| 17 | Loc A, 2013 | 0.05   | 0.128     | 0.116        | 0.114                      | 0.089   | 153               |
| 18 | Loc E, 2014 | -0.02  | -0.007    | 0.027        | -0.013                     | 0.354   | 79                |
| 19 | Loc B, 2014 | -0.037 | -0.021    | -0.046       | -0.044                     | -0.133  | 79                |
| 20 | Loc B, 2014 | 0.258  | 0.272     | 0.012        | 0.054                      | 0.122   | 106               |
| 21 | Loc C, 2014 | 0.344  | 0.324     | 0.375        | 0.345                      | 0.065   | 106               |
| 22 | Loc E, 2014 | 0.325  | 0.42      | 0.371        | 0.404                      | 0.275   | 105               |
| 23 | Loc H, 2015 | 0.199  | 0.12      | 0.166        | 0.122                      | 0.251   | 64                |
| 24 | Loc F, 2015 | 0.246  | 0.245     | 0.197        | 0.295                      | 0.097   | 64                |
| 25 | Loc B, 2015 | -0.069 | -0.093    | 0.227        | 0.257                      | -0.289  | 64                |
| 26 | Loc B, 2013 | 0.091  | 0.084     | 0.078        | 0.083                      | 0.058   | 488               |
| 27 | Loc G, 2013 | 0.181  | 0.236     | 0.151        | 0.138                      | -0.015  | 244               |
| 28 | Loc E, 2013 | 0.243  | 0.222     | 0.234        | 0.236                      | -0.052  | 244               |
| 29 | Loc C, 2014 | 0.292  | 0.36      | 0.385        | 0.382                      | -0.069  | 120               |
| 30 | Loc F, 2015 | 0.053  | 0.169     | 0.186        | 0.161                      | 0.002   | 39                |
| 31 | Loc E, 2014 | 0.232  | 0.217     | 0.25         | 0.208                      | -0.062  | 120               |
| 32 | Loc B, 2015 | -0.056 | -0.083    | -0.062       | -0.071                     | -0.292  | 39                |
| 33 | Loc B, 2014 | 0.01   | -0.016    | -0.145       | -0.137                     | 0.086   | 91                |
| 34 | Loc E, 2014 | 0.221  | 0.306     | 0.382        | 0.367                      | -0.157  | 91                |
| 35 | Loc C, 2014 | 0.273  | 0.25      | 0.232        | 0.258                      | 0.089   | 91                |
| 36 | Loc H, 2015 | 0.044  | 0.006     | 0.159        | 0.123                      | -0.206  | 42                |
| 37 | Loc B, 2015 | -0.041 | 0.035     | 0.145        | 0.128                      | 0.219   | 42                |
| 38 | Loc B, 2015 | 0.095  | -0.039    | 0.008        | 0.012                      | 0.039   | 64                |
| 39 | Loc F, 2015 | -0.037 | 0         | -0.039       | 0.03                       | 0.078   | 64                |
| 40 | Loc H, 2015 | 0.25   | 0.259     | 0.261        | 0.262                      | 0.253   | 63                |
| 41 | Loc C, 2015 | -0.204 | -0.341    | -0.353       | -0.359                     | -0.143  | 60                |

Table S 3: Results for individual test folds.
